# Supplementary material
Source: MDPI journal article supplement (https://www.mdpi.com/2225-1154/11/5/111)
Supplement: s1 [file s1]

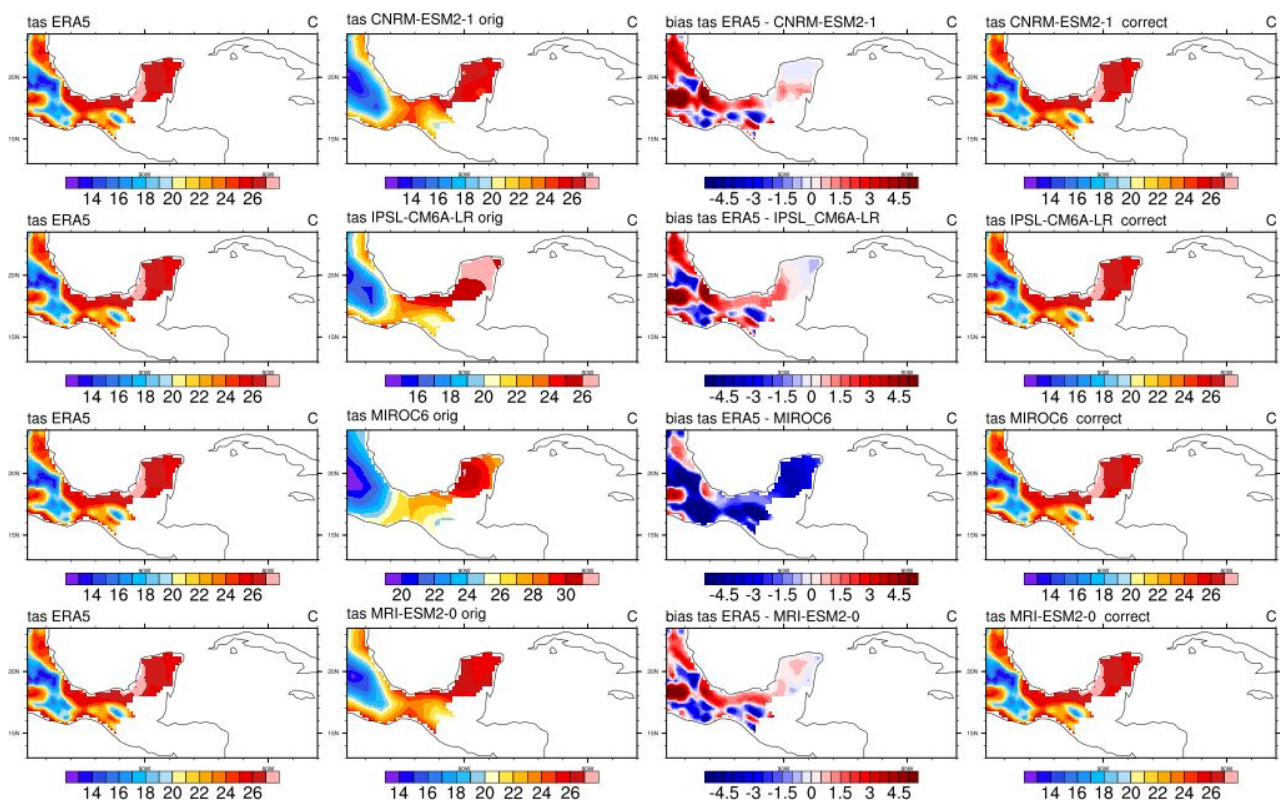

**Figure S1.** Spatial distribution of mean surface temperature (tas) with ERA5 (first column) for the south-southeast zone and the four models (CNRM-ESM2-1, IPSL-CM6A-LR, MIROC6, MRI-ESM2-0) in the historical period 1980-2014 without (second column) and with correction (fourth column) and the bias of each one (third column).

**Table S1.** Trend slopes throughout the three future periods (2021-2040, 2041-2060, 2081-2100) with the four models (CNRM-ESM2-1, IPSL-CM6A-LR, MIROC6, MRI-ESM2-0) and under the three scenarios SSP2-4.5, SSP4-6.0 and SSP5-8.5 with the simple difference bias correction.

| SCENARIO | PERIOD    | MODEL        | M SOUTH<br>(°C/year)<br>(stdErr) | P-VALUE | M SOUTHEAST<br>(°C/year) (stdErr) | P-VALUE |
|----------|-----------|--------------|----------------------------------|---------|-----------------------------------|---------|
| SSP2-4.5 | 2021-2040 | CNRM-ESM2-1  | 0.02 (0.011)                     | 0.94    | 0.02 (0.009)                      | 0.91    |
| SSP2-4.5 | 2021-2040 | IPSL-CM6A-LR | 0.03 (0.010)                     | 0.99    | 0.03 (0.010)                      | 0.99    |
| SSP2-4.5 | 2021-2040 | MIROC6       | 0.04 (0.018)                     | 0.99    | 0.07 (0.017)                      | 0.99    |
| SSP2-4.5 | 2021-2040 | MRI_ESM2_0   | 0.04 (0.015)                     | 0.99    | 0.05 (0.013)                      | 1       |
| SSP2-4.5 | 2041-2060 | CNRM-ESM2-1  | 0.04 (0.014)                     | 0.99    | 0.04 (0.013)                      | 0.99    |
| SSP2-4.5 | 2041-2060 | IPSL-CM6A-LR | 0.03 (0.013)                     | 0.97    | 0.04 (0.011)                      | 0.99    |
| SSP2-4.5 | 2041-2060 | MIROC6       | 0.03 (0.022)                     | 0.86    | 0.04 (0.017)                      | 0.93    |
| SSP2-4.5 | 2041-2060 | MRI_ESM2_0   | 0.03 (0.014)                     | 0.97    | 0.06 (0.011)                      | 1.00    |
| SSP2-4.5 | 2081-2100 | CNRM-ESM2-1  | 0.03 (0.012)                     | 0.97    | 0.02 (0.014)                      | 0.82    |
| SSP2-4.5 | 2081-2100 | IPSL-CM6A-LR | 0.00 (0.016)                     | 0.08    | 0.00 (0.012)                      | 0.18    |
| SSP2-4.5 | 2081-2100 | MIROC6       | 0.02 (0.016)                     | 0.77    | 0.00 (0.019)                      | 0.18    |
| SSP2-4.5 | 2081-2100 | MRI_ESM2_0   | 0.02 (0.016)                     | 0.79    | 0.02 (0.013)                      | 0.72    |
| SSP4-6.0 | 2021-2040 | CNRM-ESM2-1  | 0.05 (0.013)                     | 0.99    | 0.06 (0.012)                      | 1.00    |
| SSP4-6.0 | 2021-2040 | IPSL-CM6A-LR | 0.05 (0.014)                     | 0.99    | 0.05 (0.012)                      | 1.00    |
| SSP4-6.0 | 2021-2040 | MIROC6       | 0.03 (0.016)                     | 0.74    | 0.03 (0.017)                      | 0.97    |
| SSP4-6.0 | 2021-2040 | MRI_ESM2_0   | 0.03 (0.015)                     | 0.93    | 0.04 (0.011)                      | 0.99    |
| SSP4-6.0 | 2041-2060 | CNRM-ESM2-1  | 0.05 (0.011)                     | 1.00    | 0.04 (0.011)                      | 1.00    |
| SSP4-6.0 | 2041-2060 | IPSL-CM6A-LR | 0.04 (0.014)                     | 0.99    | 0.04 (0.013)                      | 1.00    |
| SSP4-6.0 | 2041-2060 | MIROC6       | 0.06 (0.020)                     | 0.94    | 0.04 (0.022)                      | 0.89    |
| SSP4-6.0 | 2041-2060 | MRI_ESM2_0   | 0.01 (0.013)                     | 0.58    | 0.02 (0.013)                      | 0.91    |
| SSP4-6.0 | 2081-2100 | CNRM-ESM2-1  | 0.06 (0.009)                     | 1.00    | 0.07(0.011)                       | 1.00    |
| SSP4-6.0 | 2081-2100 | IPSL-CM6A-LR | 0.02 (0.010)                     | 0.74    | 0.02 (0.008)                      | 0.94    |
| SSP4-6.0 | 2081-2100 | MIROC6       | 0.01 (0.020)                     | 0.50    | 0.01 (0.017)                      | 0.15    |
| SSP4-6.0 | 2081-2100 | MRI_ESM2_0   | 0.01 (0.014)                     | 0.37    | 0.02 (0.013)                      | 0.90    |
| SSP5-8.5 | 2021-2040 | CNRM-ESM2-1  | 0.04 (0.014)                     | 1.00    | 0.03 (0.014)                      | 0.97    |
| SSP5-8.5 | 2021-2040 | IPSL-CM6A-LR | 0.03 (0.010)                     | 0.95    | 0.03 (0.010)                      | 0.98    |
| SSP5-8.5 | 2021-2040 | MIROC6       | 0.05 (0.017)                     | 0.98    | 0.08 (0.019)                      | 1.00    |
| SSP5-8.5 | 2021-2040 | MRI_ESM2_0   | 0.06 (0.010)                     | 1.00    | 0.04 (0.011)                      | 1.00    |
| SSP5-8.5 | 2041-2060 | CNRM-ESM2-1  | 0.07 (0.012)                     | 1.00    | 0.05 (0.015)                      | 0.99    |
| SSP5-8.5 | 2041-2060 | IPSL-CM6A-LR | 0.06 (0.014)                     | 1.00    | 0.06 (0.011)                      | 1.00    |
| SSP5-8.5 | 2041-2060 | MIROC6       | 0.06 (0.016)                     | 1.00    | 0.04 (0.021)                      | 0.99    |
| SSP5-8.5 | 2041-2060 | MRI_ESM2_0   | 0.03 (0.014)                     | 0.95    | 0.04 (0.012)                      | 0.99    |
| SSP5-8.5 | 2081-2100 | CNRM-ESM2-1  | 0.10 (0.012)                     | 1.00    | 0.08 (0.012)                      | 1.00    |
| SSP5-8.5 | 2081-2100 | IPSL-CM6A-LR | 0.07 (0.016)                     | 1.00    | 0.07 (0.012)                      | 1.00    |
| SSP5-8.5 | 2081-2100 | MIROC6       | 0.06 (0.020)                     | 0.99    | 0.08 (0.023)                      | 1.00    |
| SSP5-8.5 | 2081-2100 | MRI_ESM2_0   | 0.06 (0.014)                     | 1.00    | 0.07 (0.011)                      | 1.00    |

**Table S2.** Historical trends (1980-2014) for the ERA 5 and four models with bias correction.

| PERIOD    | MODEL        | M SOUTH (stdErr) | P-VALUE | M SOUTHEAST (stdErr) | P-VALUE |
|-----------|--------------|------------------|---------|----------------------|---------|
| 1980-2014 | ERA-5        | 0.012 (0.004)    | 1.00    | 0.039 (0.004)        | 1.00    |
| 1980-2014 | CNRM-ESM2-1  | 0.032 (0.004)    | 1.00    | 0.032 (0.004)        | 1.00    |
| 1980-2014 | IPSL-CM6A-LR | 0.026 (0.005)    | 1.00    | 0.026 (0.005)        | 1.00    |
| 1980-2014 | MIROC6       | 0.032 (0.007)    | 1.00    | 0.032 (0.007)        | 1.00    |
| 1980-2014 | MRI ESM2 0   | 0.019 (0.004)    | 1.00    | 0.019 (0.004)        | 1.00    |

**Table S3.** Values of the  $z\text{-eq}$  for the four models regarding the historical period (1980-2014) and future time of the models in each region (south and southeast).

| MODEL        | SCENARIO | PERIOD    | $z\text{-eq}$<br>MODELS<br>(SOUTH) | $z\text{-eq}$<br>MODELS<br>(SOUTHEAST) |
|--------------|----------|-----------|------------------------------------|----------------------------------------|
| CNRM-ESM2-1  | SSP2-4.5 | 2021-2040 | -1.02                              | -1.05                                  |
| CNRM-ESM2-1  | SSP4-6.0 | 2021-2040 | 1.32                               | 2.01                                   |
| CNRM-ESM2-1  | SSP5-8.5 | 2021-2040 | 0.55                               | -0.13                                  |
| CNRM-ESM2-1  | SSP2-4.5 | 2041-2060 | 0.55                               | 0.54                                   |
| CNRM-ESM2-1  | SSP4-6.0 | 2041-2060 | 1.54                               | 0.61                                   |
| CNRM-ESM2-1  | SSP5-8.5 | 2041-2060 | 3.00                               | 1.09                                   |
| CNRM-ESM2-1  | SSP2-4.5 | 2081-2100 | -0.16                              | -0.77                                  |
| CNRM-ESM2-1  | SSP4-6.0 | 2081-2100 | 2.84                               | 2.91                                   |
| CNRM-ESM2-1  | SSP5-8.5 | 2081-2100 | 5.38                               | 3.45                                   |
| IPSL-CM6A-LR | SSP2-4.5 | 2021-2040 | 0.36                               | 2.15                                   |
| IPSL-CM6A-LR | SSP4-6.0 | 2021-2040 | 1.61                               | 1.08                                   |
| IPSL-CM6A-LR | SSP5-8.5 | 2021-2040 | 0.36                               | 1.25                                   |
| IPSL-CM6A-LR | SSP2-4.5 | 2041-2060 | 0.29                               | 2.81                                   |
| IPSL-CM6A-LR | SSP4-6.0 | 2041-2060 | 0.94                               | -0.43                                  |
| IPSL-CM6A-LR | SSP5-8.5 | 2041-2060 | 2.29                               | 1.16                                   |
| IPSL-CM6A-LR | SSP2-4.5 | 2081-2100 | -1.55                              | -0.46                                  |
| IPSL-CM6A-LR | SSP4-6.0 | 2081-2100 | -0.54                              | -0.64                                  |
| IPSL-CM6A-LR | SSP5-8.5 | 2081-2100 | 2.62                               | 3.38                                   |
| MIROC6       | SSP2-4.5 | 2021-2040 | 0.41                               | 2.07                                   |
| MIROC6       | SSP4-6.0 | 2021-2040 | -0.11                              | -0.10                                  |
| MIROC6       | SSP5-8.5 | 2021-2040 | 0.98                               | 2.37                                   |
| MIROC6       | SSP2-4.5 | 2041-2060 | -0.087                             | 0.44                                   |
| MIROC6       | SSP4-6.0 | 2041-2060 | 1.32                               | 0.35                                   |
| MIROC6       | SSP5-8.5 | 2041-2060 | 1.60                               | 0.36                                   |
| MIROC6       | SSP2-4.5 | 2081-2100 | -0.69                              | -1.58                                  |
| MIROC6       | SSP4-6.0 | 2081-2100 | -1.04                              | -1.20                                  |
| MIROC6       | SSP5-8.5 | 2081-2100 | 1.32                               | 1.99                                   |
| MRI ESM2 0   | SSP2-4.5 | 2021-2040 | 1.35                               | 2.28                                   |
| MRI ESM2 0   | SSP4-6.0 | 2021-2040 | 0.71                               | 1.79                                   |
| MRI ESM2 0   | SSP5-8.5 | 2021-2040 | 3.80                               | 1.79                                   |
| MRI ESM2 0   | SSP2-4.5 | 2041-2060 | 0.76                               | 3.50                                   |

|            |          |           |       |      |
|------------|----------|-----------|-------|------|
| MRI ESM2 0 | SSP4-6.0 | 2041-2060 | -0.66 | 0.07 |
| MRI ESM2 0 | SSP5-8.5 | 2041-2060 | 0.75  | 1.66 |
| MRI ESM2 0 | SSP2-4.5 | 2081-2100 | 0.06  | 0.07 |
| MRI ESM2 0 | SSP4-6.0 | 2081-2100 | -0.62 | 0.07 |
| MRI ESM2 0 | SSP5-8.5 | 2081-2100 | 2.82  | 4.36 |
